# Supplementary material
Source: publisher figshare collection journal article supplement (https://karger.figshare.com/ndownloader/files/22094706)
Supplement: Supplementary file 1 [file 22094706]

**SUPPLEMENTARY MATERIAL**

**Table 1 – supplementary material – Regression model considering Laval activity/mobility domain**

| **Dependent variable** | **Explanatory variables** | **ß** | **SE** | **Standard coeff ß** | **p** | **Model summary** | |
| --- | --- | --- | --- | --- | --- | --- | --- |
| Laval activity/  mobility domain | ***Block-wise regression analysis*** | | | | | | |
| Age, Comorbidity, BMI, Education level, Occupation, SCL-90 symptoms *, TSD-OC domains** | | | | | ***R2*** | 0.67 |
| ***Adj R2*** | 0.64 |
| ***SE of estimate*** | 0.9 |
| ***Stepwise regression analysis*** | | | | | | |
| TSD-OC pain | -1.28 | 0.31 | -0.23 | < 0.001 | ***R2*** | 0.65 |
| SCL-90 somatisation | -0.6 | 0.08 | -0.35 | < 0.001 | ***Adj R2*** | 0.64 |
| TSD-OC social life | -1.07 | 0.33 | -0.17 | 0.001 | ***SE of estimate*** | 0.9 |
| BMI | -0.03 | 0.008 | -0.14 | <0.001 |  | |
| TSD-OC ADL | -0.65 | 0.23 | -0.14 | 0.005 |
| Age | -0.01 | 0.004 | -0.096 | 0.013 |

***Legend:*** SCL-90: Symptom Checklist-90; TSD-OC: Test SIO per le Disabilita’ Obesita’ Correlate (Italian Society of Obesity test for obesity-related disabilities); GSI: global severity index; BMI: Body mass Index; ADL: activities of daily living; *SCL-90 symptoms: somatization, obsessive-compulsive, interpersonal, depression, anxiety, hostility, phobic anxiety, paranoid ideation; **TSD-OC domains: pain, stiffness, functionality and autonomy in daily activities, housework, outdoor activities, occupational activities, and social life

**Table 2 – supplementary material – Regression model considering Laval symptoms domain**

| **Dependent variable** | **Explanatory variables** | **ß** | **SE** | **Standard coeff ß** | **p** | **Model summary** | |
| --- | --- | --- | --- | --- | --- | --- | --- |
| Laval symptoms | ***Block-wise regression analysis*** | | | | | | |
| Age, Comorbidity, BMI, Education level, Occupation, SCL-90 symptoms *, TSD-OC domains** | | | | | ***R2*** | 0.58 |
| ***Adj R2*** | 0.55 |
| ***SE of estimate*** | 0.8 |
| ***Stepwise regression analysis*** | | | | | | |
| TSD-OC pain | -1.44 | 0.23 | -0.32 | < 0.001 | ***R2*** | 0.54 |
| SCL-90 somatisation | -0.63 | 0.07 | -0.45 | < 0.001 | ***Adj R2*** | 0.54 |
| BMI | -0.03 | 0.007 | -0.14 | 0.001 | ***SE of estimate*** | 0.82 |

***Legend:*** SCL-90: Symptom Checklist-90; TSD-OC: Test SIO per le Disabilita’ Obesita’ Correlate (Italian Society of Obesity test for obesity-related disabilities); GSI: global severity index; BMI: Body mass Index; *SCL-90 symptoms: somatization, obsessive-compulsive, interpersonal, depression, anxiety, hostility, phobic anxiety, paranoid ideation; **TSD-OC domains: pain, stiffness, functionality and autonomy in daily activities, housework, outdoor activities, occupational activities, and social life

**Table 3 – supplementary material – Regression model considering Laval personal hygiene/clothing domain**

| **Dependent variable** | **Explanatory variables** | **ß** | **SE** | **Standard coeff ß** | **p** | **Model summary** | |
| --- | --- | --- | --- | --- | --- | --- | --- |
| Laval personal hygiene/ clothing | ***Block-wise regression analysis*** | | | | | | |
| Age, Comorbidity, BMI, Education level, Occupation, SCL-90 symptoms *, TSD-OC domains** | | | | | ***R2*** | 0.54 |
| ***Adj R2*** | 0.5 |
| ***SE of estimate*** | 1.02 |
| ***Stepwise regression analysis*** | | | | | | |
| TSD-OC pain | -1.08 | 0.32 | -0.2 | 0.001 | ***R2*** | 0.5 |
| SCL-90 interpersonal | -0.42 | 0.09 | -0.23 | < 0.001 | ***Adj R2*** | 0.49 |
| TSD-OC social life | -1.27 | 0.4 | -0.21 | 0.002 | ***SE of estimate*** | 1.03 |
| BMI | -0.02 | 0.01 | -0.105 | 0.026 |  | |
| TSD-OC ADL | -0.94 | 0.27 | -0.21 | <0.001 |
| Occupation | 0.065 | 0.03 | 0.095 | 0.032 |

***Legend:*** SCL-90: Symptom Checklist-90; TSD-OC: Test SIO per le Disabilita’ Obesita’ Correlate (Italian Society of Obesity test for obesity-related disabilities); GSI: global severity index; BMI: Body mass Index; ADL: activities of daily living; *SCL-90 symptoms: somatization, obsessive-compulsive, interpersonal, depression, anxiety, hostility, phobic anxiety, paranoid ideation; **TSD-OC domains: pain, stiffness, functionality and autonomy in daily activities, housework, outdoor activities, occupational activities, and social life

**Table 4 – supplementary material – Regression model considering Laval emotion domain**

| **Dependent variable** | **Explanatory variables** | **ß** | **SE** | **Standard coeff ß** | **p** | **Model summary** | |
| --- | --- | --- | --- | --- | --- | --- | --- |
| Laval emotion | ***Block-wise regression analysis*** | | | | | | |
| Age, Comorbidity, BMI, Education level, Occupation, SCL-90 symptoms *, TSD-OC domains** | | | | | ***R2*** | 0.58 |
| ***Adj R2*** | 0.55 |
| ***SE of estimate*** | 0.86 |
| ***Stepwise regression analysis*** | | | | | | |
| Occupation | 0.06 | 0.03 | 0.1 | 0.02 | ***R2*** | 0.55 |
| SCL-90 depression | -0.89 | 0.07 | -0.58 | < 0.001 | ***Adj R2*** | 0.55 |
| TSD-OC social life | -1.46 | 0.25 | -0.27 | < 0.001 | ***SE of estimate*** | 0.86 |
| Age | 0.011 | 0.004 | 0.123 | 0.004 |  | |

***Legend:*** SCL-90: Symptom Checklist-90; TSD-OC: Test SIO per le Disabilita’ Obesita’ Correlate (Italian Society of Obesity test for obesity-related disabilities); GSI: global severity index; BMI: Body mass Index; *SCL-90 symptoms: somatization, obsessive-compulsive, interpersonal, depression, anxiety, hostility, phobic anxiety, paranoid ideation; **TSD-OC domains: pain, stiffness, functionality and autonomy in daily activities, housework, outdoor activities, occupational activities, and social life

**Table 5 – supplementary material – Regression model considering Laval social interaction domain**

| **Dependent variable** | **Explanatory variables** | **ß** | **SE** | **Standard coeff ß** | **p** | **Model summary** | |
| --- | --- | --- | --- | --- | --- | --- | --- |
| Laval social interaction | ***Block-wise regression analysis*** | | | | | | |
| Age, Comorbidity, BMI, Education level, Occupation, SCL-90 symptoms *, TSD-OC domains** | | | | | ***R2*** | 0.54 |
| ***Adj R2*** | 0.5 |
| ***SE of estimate*** | 0.92 |
| ***Stepwise regression analysis*** | | | | | | |
| TSD-OC pain | -0.63 | 0.29 | -0.13 | 0.029 | ***R2*** | 0.52 |
| SCL-90 interpersonal | -0.44 | 0.12 | -0.27 | < 0.001 | ***Adj R2*** | 0.5 |
| TSD-OC social life | -1.53 | 0.34 | -0.28 | < 0.001 | ***SE of estimate*** | 0.92 |
| BMI | -0.03 | 0.009 | -0.17 | < 0.001 |  | |
| SCL-90 depression | -0.25 | 0.12 | -0.16 | <0.029 |
| Comorbidity | 0.112 | 0.037 | 0.14 | 0.003 |

***Legend:*** SCL-90: Symptom Checklist-90; TSD-OC: Test SIO per le Disabilita’ Obesita’ Correlate (Italian Society of Obesity test for obesity-related disabilities); GSI: global severity index; BMI: Body mass Index; *SCL-90 symptoms: somatization, obsessive-compulsive, interpersonal, depression, anxiety, hostility, phobic anxiety, paranoid ideation; **TSD-OC domains: pain, stiffness, functionality and autonomy in daily activities, housework, outdoor activities, occupational activities, and social life

**Table 6 – supplementary material – Regression model considering Laval sexual life domain**

| **Dependent variable** | **Explanatory variables** | **ß** | **SE** | **Standard coeff ß** | **p** | **Model summary** | |
| --- | --- | --- | --- | --- | --- | --- | --- |
| Laval sexual life | ***Block-wise regression analysis*** | | | | | | |
| Age, Comorbidity, BMI, Education level, Occupation, SCL-90 symptoms *, TSD-OC domains** | | | | | ***R2*** | 0.39 |
| ***Adj R2*** | 0.35 |
| ***SE of estimate*** | 1.28 |
| ***Stepwise regression analysis*** | | | | | | |
| TSD-OC pain | -1.5 | 0.39 | -0.26 | < 0.001 | ***R2*** | 0.34 |
| SCL-90 interpersonal | -0.72 | 0.11 | -0.37 | < 0.001 | ***Adj R2*** | 0.33 |
| TSD-OC social life | -0.96 | 0.46 | -0.14 | 0.039 | ***SE of estimate*** | 1.29 |
| Comorbidity | 0.16 | 0.05 | 0.16 | 0.003 |  | |

***Legend:*** SCL-90: Symptom Checklist-90; TSD-OC: Test SIO per le Disabilita’ Obesita’ Correlate (Italian Society of Obesity test for obesity-related disabilities); GSI: global severity index; BMI: Body mass Index; *SCL-90 symptoms: somatization, obsessive-compulsive, interpersonal, depression, anxiety, hostility, phobic anxiety, paranoid ideation; **TSD-OC domains: pain, stiffness, functionality and autonomy in daily activities, housework, outdoor activities, occupational activities, and social life
